# Supplementary material for: Spatial Regulation of Mitochondrial Heterogeneity by Stromal Confinement in Micropatterned Tumor Models
Source: PubMed Central journal article supplement (PMC6671984; doi:10.1038/s41598-019-47593-8), 2019-08-01
Supplement: 41598_2019_47593_MOESM1_ESM.pdf [file 41598_2019_47593_MOESM1_ESM.pdf]

## **Supplementary Information**

### **Spatial Regulation of Mitochondrial Heterogeneity by Stromal Confinement in Micropatterned Tumor Models**

Hydari Masuma Begum<sup>1</sup>, Hoang P Ta<sup>1</sup>, Hao Zhou<sup>1</sup>, Yuta Ando<sup>1</sup>, Diane Kang<sup>2</sup>, Kristen Nemes<sup>3</sup>,  
Chelsea Mariano<sup>1</sup>, Jia Hao<sup>1</sup>, Min Yu<sup>2,4</sup>, Keyue Shen<sup>1,4,5\*</sup>

<sup>1</sup>Department of Biomedical Engineering, Viterbi School of Engineering, University of Southern California, Los Angeles, CA 90089

<sup>2</sup>Department of Stem Cell Biology and Regenerative Medicine, Keck School of Medicine, University of Southern California, Los Angeles, CA 90033

<sup>3</sup>Mork Family Department of Chemical Engineering, Viterbi School of Engineering, University of Southern California, Los Angeles, CA 90089

<sup>4</sup>Norris Comprehensive Cancer Center, Keck School of Medicine, University of Southern California, Los Angeles, CA 90033

<sup>5</sup>USC Stem Cell, Keck School of Medicine, University of Southern California, Los Angeles, CA 90033

\*Correspondence should be addressed to Keyue Shen ([keyue.shen@usc.edu](mailto:keyue.shen@usc.edu))

**Supplementary Figures**

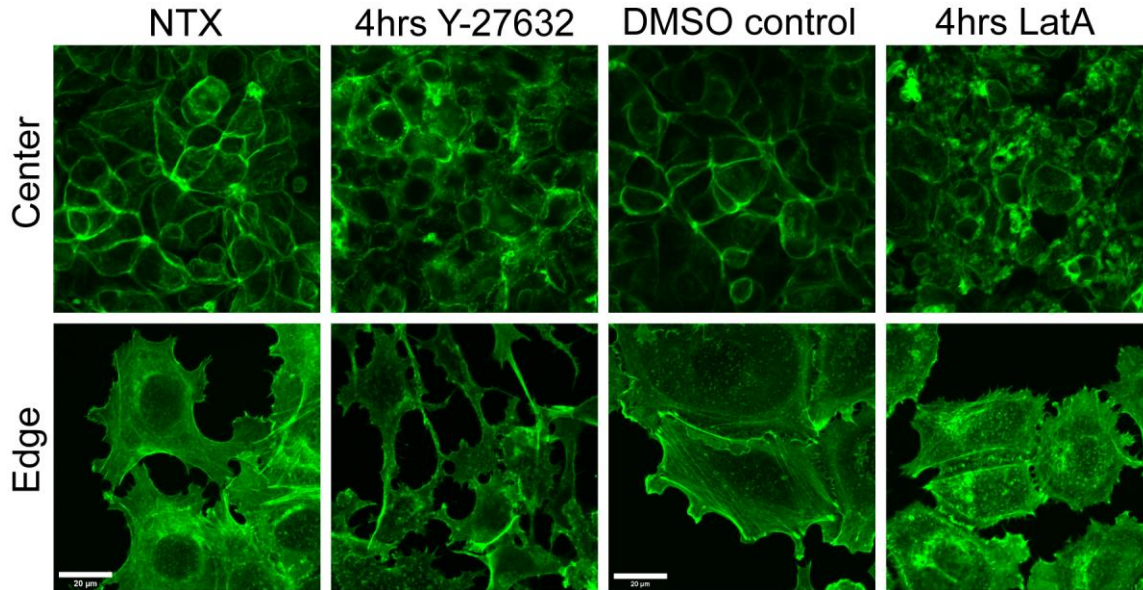

**Figure S1.** Fluorescence images showing F-actin staining in MCF-7 cells at the centers and edges of day 4 micro-patterns, after 4 hours of drug treatment with 50 $\mu$ M Y-27632 or 0.5 $\mu$ M Latrunculin A, along with their respective no treatment controls. Representative images shown from three images per condition, scale bar = 25 $\mu$ m.

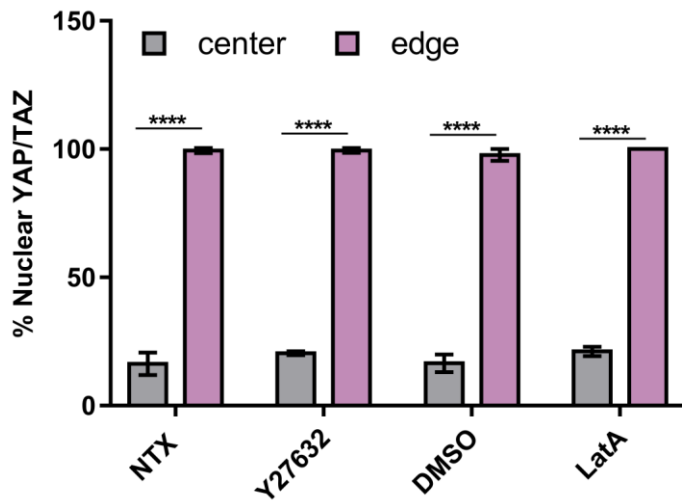

**Figure S2.** Quantification of nuclear YAP/TAZ in MCF-7 cells at the centers and edges of day 4 micropatterns, following 12 hours of drug treatment with 50 $\mu$ M Y-27632 or 0.5 $\mu$ M Latrunculin A, along with their respective no treatment controls. Three fluorescence images per region were quantified,  $p < 0.0001$  in an ordinary One-Way ANOVA.
